Development 133, 1203 (2006) doi:10.1242/dev.02314

## Mammary ductal morphogenesis requires paracrine activation of stromal EGFR via ADAM17-dependent shedding of epithelial amphiregulin

**Mark D. Sternlicht, Susan W. Sunnarborg, Hosein Kouros-Mehr, Ying Yu, David C. Lee and Zena Werb**  
*Development* **132**, 3923-3933.

On p. 3924 of this article in the section 'Mammary organoid culture', the concentrations of three constituents in the basal medium are incorrect. The correct concentrations are 10  $\mu\text{g/ml}$  insulin, 5.5  $\mu\text{g/ml}$  transferrin and 5  $\text{ng/ml}$  sodium selenite.

In addition, the authors also wish to acknowledge Jimmie E. Fata for his suggestions regarding this assay.

The authors apologise to readers for these mistakes.
